# Supplementary material for: Gain-of-function mutations in a member of the Src family kinases cause autoinflammatory bone disease in mice and humans
Source: PubMed Central journal article supplement — Proc Natl Acad Sci U S A. 2019 May 28;116(24):11872–7. doi: 10.1073/pnas.1819825116 (PMC6575637; doi:10.1073/pnas.1819825116), 2019-05-28
Supplement: pnas.1819825116.sapp.pdf [file pnas.1819825116.sapp.pdf]

## Supplementary Information for

### **Gain-of-Function Mutations in a Member of the Src Family Kinases Cause Autoinflammatory Bone Disease in Mice and Humans**

Koichiro Abe<sup>a,1,\*</sup>, Allison Cox<sup>b,1</sup>, Nobuhiko Takamatsu<sup>c</sup>, Gabriel Velez<sup>d,e</sup>, Ronald M. Laxer<sup>f</sup>, Shirley M.L. Tse<sup>f</sup>, Vinit B. Mahajan<sup>d</sup>, Alexander G. Bassuk<sup>b</sup>, Helmut Fuchs<sup>g</sup>, Polly J. Ferguson<sup>b,2</sup> & Martin Hrabě de Angelis<sup>g,h,i,2</sup>

Koichiro Abe

Email: [abeko@is.icc.u-tokai.ac.jp](mailto:abeko@is.icc.u-tokai.ac.jp)

#### **This PDF file includes:**

Supplementary text  
Figs. S1 to S7  
Tables S1 to S4  
References for SI reference citations

# Supplementary Information

## Main Text

## Results and Discussion

**Structural modeling of mutated FGR proteins.** We have used structural modeling to help determine the pathogenicity of gene mutations (1-3), and did so for the FGR mutants. Crystal structures for SRC, both in its active and inactive form, have been solved (4). We generated three-dimensional models of FGR using these structures as templates (*SI Appendix*, Fig. S4 and S6).

The *de novo* Arg118Trp mutation removes a positive charge near the distal loop of the SH3 domain, a domain involved in mediating peptide bonding and protein-protein interactions (5) (*SI Appendix*, Fig. S4A). We ran all-atom molecular dynamics simulations of the wild-type and p.Arg188Trp SH3 domains using the AMBER14 force field for 100-ns each (*SI Appendix*, Fig. S5). Superimposition of the final structures



obtained during this 100-ns simulation showed that the p.Arg118Trp disrupts a hydrogen bonding interaction with the neighboring Thr125 residue (*SI Appendix*, Fig. S4C). In the SRC inactive state the SH3-SH2 domain forms a hinge that is in the closed conformation (4). During activation, the SH3 and SH2 domain unlatch from the C-terminal portion of the protein, making Tyr416 open for phosphorylation (*SI Appendix*, Fig. S4A). Disruption of this interaction may destabilize the protein, either enhancing autophosphorylation or preventing C-terminal phosphorylation by Csk.

The Pro525Ser mutation is located on the C-terminal tail of the FGR structure. The C-terminal tail is a critical regulatory region of the protein, and thus, its composition is highly conserved (*SI Appendix*, Fig. S6B). Phosphorylation of Tyr523 by Csk inactivates the enzyme by keeping it in its closed conformation. This prevents ulterior phosphorylation of Tyr412, which is important to form its open active confirmation (4). In the closed conformation, the C-terminal region binds to two hydrophobic pockets of the SH2 domain (6). Phosphorylated Tyr523 binds to the N-terminal hydrophobic pocket specifically, and the following three amino acid residues are important for this binding (6). The surface of the pocket is neutral in charge by hydrophobic residues

positioned in SH2. Thus, it is expected that the Pro525Ser mutation prevent the hydrophobic interactions within the pocket, leading to instability to form the closed confirmation (*SI Appendix*, Fig. S6A). Thus, it is suggested that the Pro525Ser mutation causes abnormal activation–inactivation cycles of FGR protein. This could lead to constitutive activation of FGR as observed in the *Ali18* mouse.

## **Methods**

### **Whole genome sequencing (WGS) by next generation sequencer (NGS).**

Genomic DNA for WGS was extracted from *Ali18*/+ and wild type kidney using QIAGEN genome tip by manufactures protocol. Briefly, the frozen kidneys were crushed by Cryo-Press (MICROTEC CO., LTD, Chiba, Japan), and then crushed powder was used for column separation. The quality of genomic DNA was assessed by Victor 3 fluorometry and gel electrophoresis, and the library construction and HiSeq NGS were ordered to Macrogen Japan (<http://www.macrogen-japan.co.jp/>). The sequence data were analyzed by IGV (<http://software.broadinstitute.org>).

**Genotyping of *Ali18* mice.** The MIT microsatellite markers used for genetic mapping are described previously (7, 8). The D4Neu12 and D4Neu6 markers were originally made using microsatellite sequences detected in the critical region of Mouse Genome sequence database; D4Neu12-L, 5'-CTGGGTCTTCAGAGCTACGTC; D4Neu12-

R, 5'-GATCTGAGGACTGTGGGGAT; D4Neu6-L, 5'-CTCCTGATTCCATTGCAGTG;

D4Neu6-R, 5'-CTATGTAGTCAGAGCTGTCCTGG.

After sequence detection of the p.Asp502Gly mutation, we continue to use the PCR primer pair of the exon of the *Fgr* gene for *Ali18* genotyping. Genomic PCR was performed using the following oligonucleotides spanning exon12 to exon13 of the *Fgr* gene: Fgr\_ex10-11L, 5'-TTAATCCAGCAGTTCCCAGG and Fgr\_ex10-11R, 5'-GGGATTGGCAAGAGCAAG. The PCR products were directly digested with the Mbo II restriction enzyme (NEB). MboII specifically recognizes wild type (5'-GAAGAA-3') but not *Ali18* (5'-GAAGG-3') sequences in the PCR products.

For genotyping of Fo and F1 mice produced by genome editing, we sequenced PCR products of exon 3 of the *Fgr* gene around the translational initiation site using the following oligonucleotides: Fgr\_ex1L, 5'-TAGTGGTACACCAGCCAGGG, and Fgr\_ex1R, 5'-CGTTGAGCTAGAGAATAGAGCTG. In addition, PCR-based genotyping of Fo mice was performed for the *Fgr*<sup>Asp502Gly</sup> mutation described above.

**Histology and bone inflammation scoring.** Hind paws were sectioned by standard histological procedure with formic acid decalcification as described previously (9). Bone inflammation was scored for each bone of feet (talus, calcaneus, navicular bone, cuneiform bone, metatarsal bone, and phalanx) according to the percentage of the bone marrow space containing inflammatory cells; 0 (no inflammation), 1 (< 25%), 2 (25-75%), and 3 (>75%). The bone inflammation scores were then averaged for each F1 animals.

**Protein preparation from tissues and transfection.** Protein samples were prepared from tissues of *Ali18/+* and *Ali18/Ali18* mice. Tissues were once frozen, and then used for making tissue powder by Cryo-Press (MICROTEC CO., LTD, Chiba, Japan). Bone marrow was flushed from femur, and put through nylon mesh; the cells were centrifuged and used for protein preparation. Protein extract was dissolved with buffer containing 1x complete protease inhibitor cocktail (Roche) and 1x phosphatase inhibitor cocktail (Nacalai tesque, Japan), and sonicated for 10 minutes. Plasmid DNA described in *SI Appendix*, Methods, was transfected into the NIH3T3 cells using the

FuGENE reagent (Roche diagnostics). After 72 hours from transfection, cells were harvested for protein preparation as described above.

**Protein phosphorylation assays.** Phosphorylation of Eno1 by Fgr, FGR or their mutants was analyzed according to Bagheri-Yarmand *et al.* (10) with slight modifications. One and half  $\mu\text{g}$  of GST-Eno1 with 4  $\mu\text{l}$  of *in vitro* transcription/translation reaction of Flag-Fgr or its mutant, or 50 ng of GST-FGR or its mutants were suspended in 15  $\mu\text{l}$  of kinase buffer [20 mM Hepes, pH 7.6, 10 mM  $\text{MgCl}_2$ , 1 mM beta-glycerolphosphate, 2.5 mM NaF, 1 mM  $\text{Na}_3\text{VO}_4$ , 1 mM DTT] containing 20  $\mu\text{M}$  ATP and 5  $\mu\text{Ci}$  of [ $\gamma$ - $^{32}\text{P}$ ]ATP. After 5 or 20 min at 30°C, the reaction was terminated by the addition of 2.5x Laemlli sample buffer, and applied to 10% SDS-polyacrylamide gel. GST-Eno1 was visualized by CBB staining, and then, the gel was subjected to autoradiography.

Phosphorylation of Fgr<sub>KD</sub> or FGR<sub>KD</sub> by Csk was analyzed as follows. One  $\mu\text{g}$  of GST-Fgr<sub>KD</sub> or GST-FGR<sub>KD</sub> alone or with 10 ng of Csk were suspended in 15  $\mu\text{l}$  of kinase buffer

[20 mM Hepes, pH 7.6, 10 mM MgCl<sub>2</sub>, 1 mM beta-glycerophosphate, 2.5 mM NaF, 1 mM Na<sub>3</sub>VO<sub>4</sub>, 1 mM DTT] containing 20 μM ATP and 5 μCi of [ $\gamma$ -<sup>32</sup>P]ATP. After 20 min at 30°C, the reaction was terminated by the addition of 2.5x Laemlli sample buffer and applied to 8.5% SDS-polyacrylamide gel. GST-Fgr<sub>KD</sub> and GST-FGR<sub>KD</sub> were visualized by CBB staining, and then, the gel was subjected to autoradiography.

**Plasmids.** For overexpression experiments in cultured cells, the constructs were made in house. Briefly, bone and bone marrow cDNA were synthesized using RNA from whole femur of wild-type C3HeB/FeJ and *Ali18/Ali18* mice, and full coding *Fgr* cDNA was amplified using a pair of PCR primers (Fgr\_rt2L, 5'-GTCTGTGGGGGCATCTGG and Fgr\_rt2R, 5'-GGGATTGGCTGATGCCAGT). The PCR products were cloned into the pTARGET vector (Promega). The insert *Fgr* coding sequences of wild type (w21) and p.Asp502Gly (A14R5) were confirmed by Sanger sequencing.

For construction of the expression plasmids of mouse *Csk*, *Fgr* (wt) and *Fgr* (mut, p.Asp502Gly), the corresponding entire coding regions were amplified by PCR using the following oligonucleotide: CSK-SpeIATG\_L1, 5'-

TTCAACTAGTATGTCF~~GG~~CAATACAGGCCG; Csk-TGAHindIII, 5'-

TTAAAGCTTTCACAGGTGCAGCTCATGGGT; Fgr\_SpeI-L1, 5'-

TTCAACTAGTAGGGCTGTGTGTTCTGCA; FgrTGA\_HindII-R2, 5'-

TTAAAGCTTCTATGTCTGGTCTCCAGGCTG. PCR products were digested with Spe I and Hind III, and then cloned into the corresponding sites of pET49b (Novagen) using the TAKARA Ligation Kit. The insert *Fgr* sequence with no undesired (Ftw) and p.Asp502Gly mutations (FTA) and the *Csk* with no undesired mutations (2-2-2) were confirmed by Sanger sequencing. To repress autophosphorylation of *Fgr*, a

p.Lys279Met (K279M) mutation was introduced using the following oligonucleotides:

Fgr-K279M\_L1, 5'-CAGTGATGACGCTGAAGCCGGGCA; Fgr-K279M\_R1, 5'-

CAGCGTCATCACTGCCACCTTTGTGC. The insert sequence with the desired mutation was confirmed by Sanger sequencing (Ftw\_KM1 and FTA\_KM4).

For kinase assays using human *FGR* mutations, the ORF clone (OHu28536D) was purchased from Genscript Japan. The coding region of *FGR* was cloned into pGEX4T2 (GE Healthcare). The p.P525S and p.R118W mutations were introduced using the following oligonucleotides: hFGR3'-XhoI\_R2-, 5'-



GCCGCTCGAGTCTATGTCTGATCCCCGGACTGG; FGR\_R118W\_L1, 5'-

GGAGGCTIGGTCTCTCAGCTC; FGR\_R118W\_R1, 5'-TGACCACCCTCCGAACCAGAGA.

For phosphorylation by Csk, a kinase dead mutation was introduced into above

constructs using the following oligonucleotides: FGR\_K291M\_L1, 5'-

GGTGATGACGCTGAAGCCGGGCA and FGR\_K291M\_R1, 5'-

GTGATTCCACCGCACTACTGCGAC.

For construction of the expression plasmid for mouse enolase 1 from amino acid 3 to 92, PCR product of the corresponding region was cloned into the *EcoRI* and *XhoI* sites of pGEX-4T-2 using the following oligonucleotides: mEno1-147FE (*EcoRI*), 5'-

ATTCGCCATGTGAATTCTCAGGAT-3'; mEno1-447RX (*XhoI*), 5'-

GTCCATCTCGAGCATCAGCTTGT-3'.

In genome editing of *Ali18* mice, to introduce various mutations around exon 3 of the *Fgr* gene in *Ali18* mice, we used the CRISPR/Cas9 system using the pX330-U6-Chimeric\_BB-CBh-hSPCas9 vector(11)(<https://adgene.org/42230>). Two guided RNA sequences, f-gRNA1 (f-gRNA1\_L: 5'-CACCGTTCTTCAGCCGTTTGGCTC and f-gRNA1\_R: 5'- AAACGAGCCAAACGGCTGAAGAAC) and f-gRNA2 (f-gRNA2\_L: 5'-

CACCTGCATCAGGGCATCTGGAAT, and f-gRNA2\_R:

AAACATTCCAGATGCCCTGATGCA), were cloned into the Bbs I site of the pX330

vector according to the Addgene's CRISPR guide

(<https://www.addgene.org/crispr/guide/>).

**Structural modeling and molecular dynamics simulations.** The three-dimensional structure of the active FGR (residues 77-529) was modeled off the crystal structure of the human tyrosine kinase c-SRC (PDB:1FMK (12); 74% sequence identity) using MODELLER 9.14 (13). The resultant model superimposed well with the template and had an RMSD of 0.2 Å over 410 Ca atoms. The inactive FGR structure was modeled using the inactive c-SRC (PDB:1Y57) (4) structure as a template. The resultant model had an RMSD of 0.2 Å over 358 Ca atoms. *In silico* mutagenesis was performed in PyMOL (Schrödinger Corporation). Charges and hydrogen atoms were added to the wild-type and mutant FGR model using PDB2PQR (14). Electrostatic potentials were calculated using APBS (15). Protein and solvent dielectric constants were set to 2.0 and 78.0, respectively. PyMOL generated all structural figures (Schrödinger Corporation).

We performed all-atom molecular dynamics (MD) simulations of wild-type and p.Arg118Trp FGR SH3 domain models using YASARA 15.7.25 software package (16). The system was then subjected to 250 ps restrained equilibration simulation in the NVT ensemble. Temperature was set to 298K and the system was solvated in water with 0.9% NaCl and a pH of 7.4. The AMBER14 (17) all-atom force field was then run for 100 ns with trajectory conformations saved every 250 ps. Analysis were performed using the YASARA macros md analyze.mcr and md analyzers.mcr.

Figure S1

A

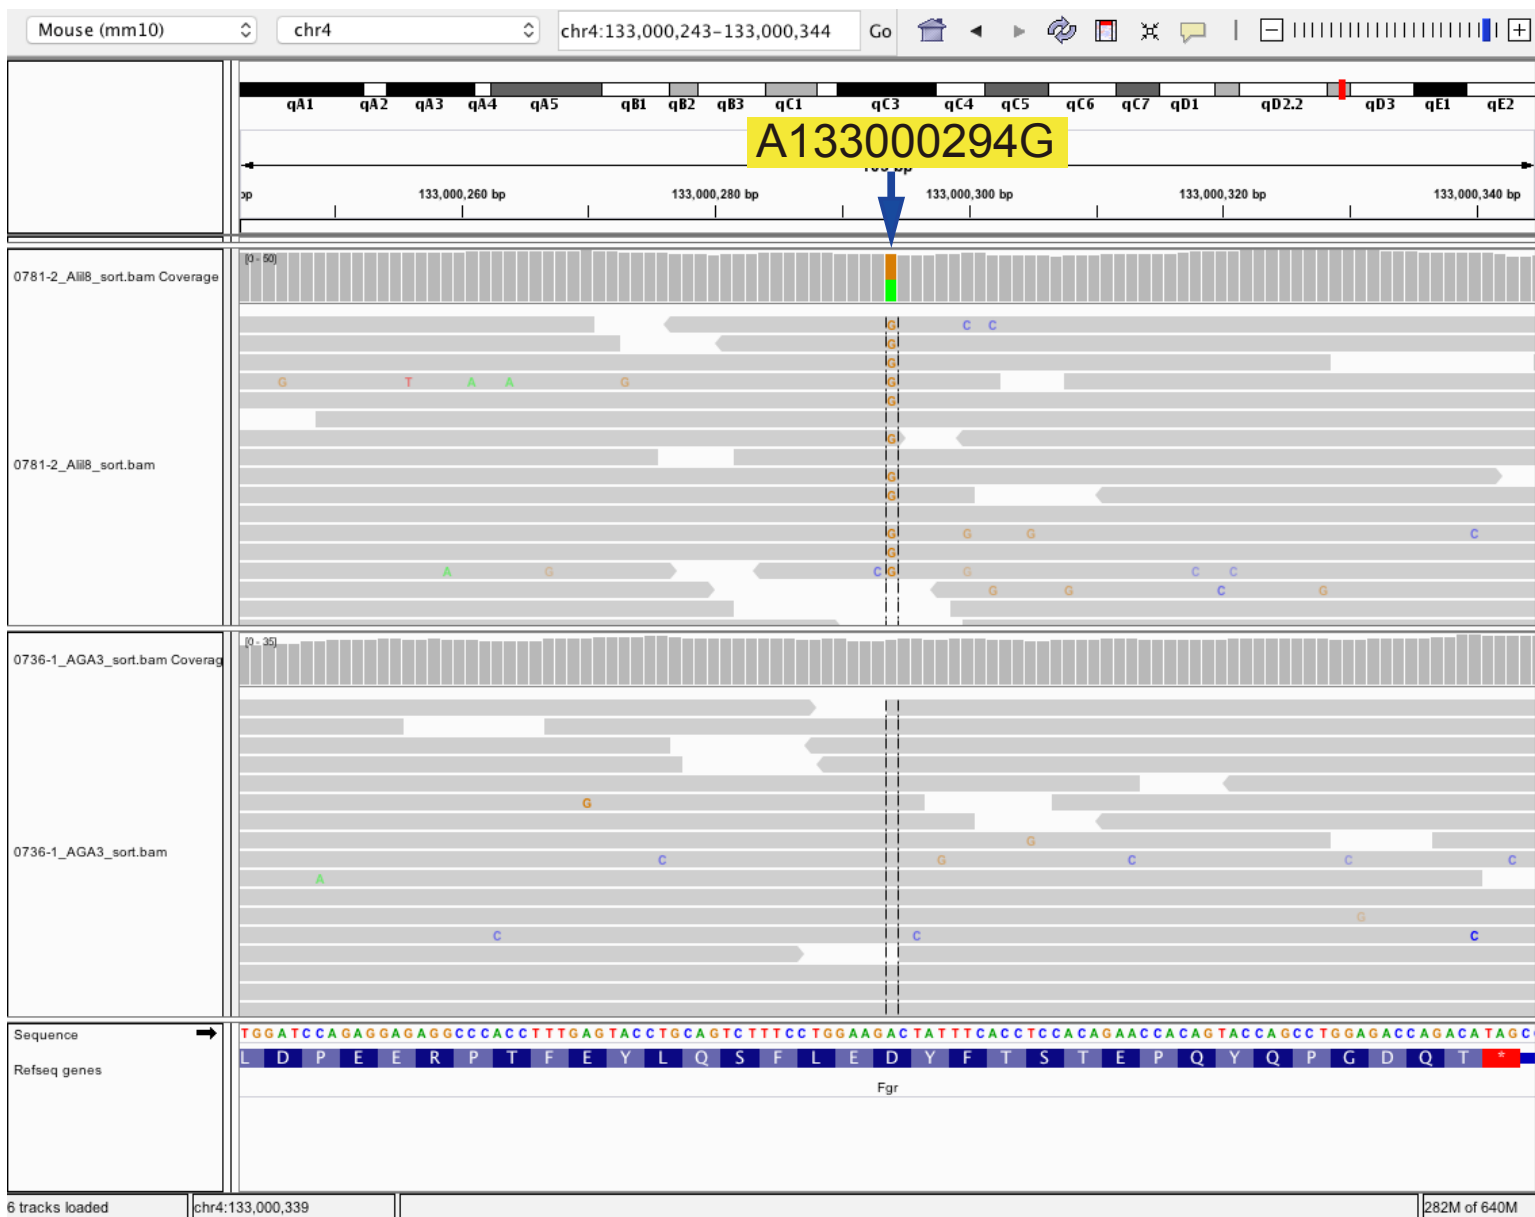

Figure S1

B

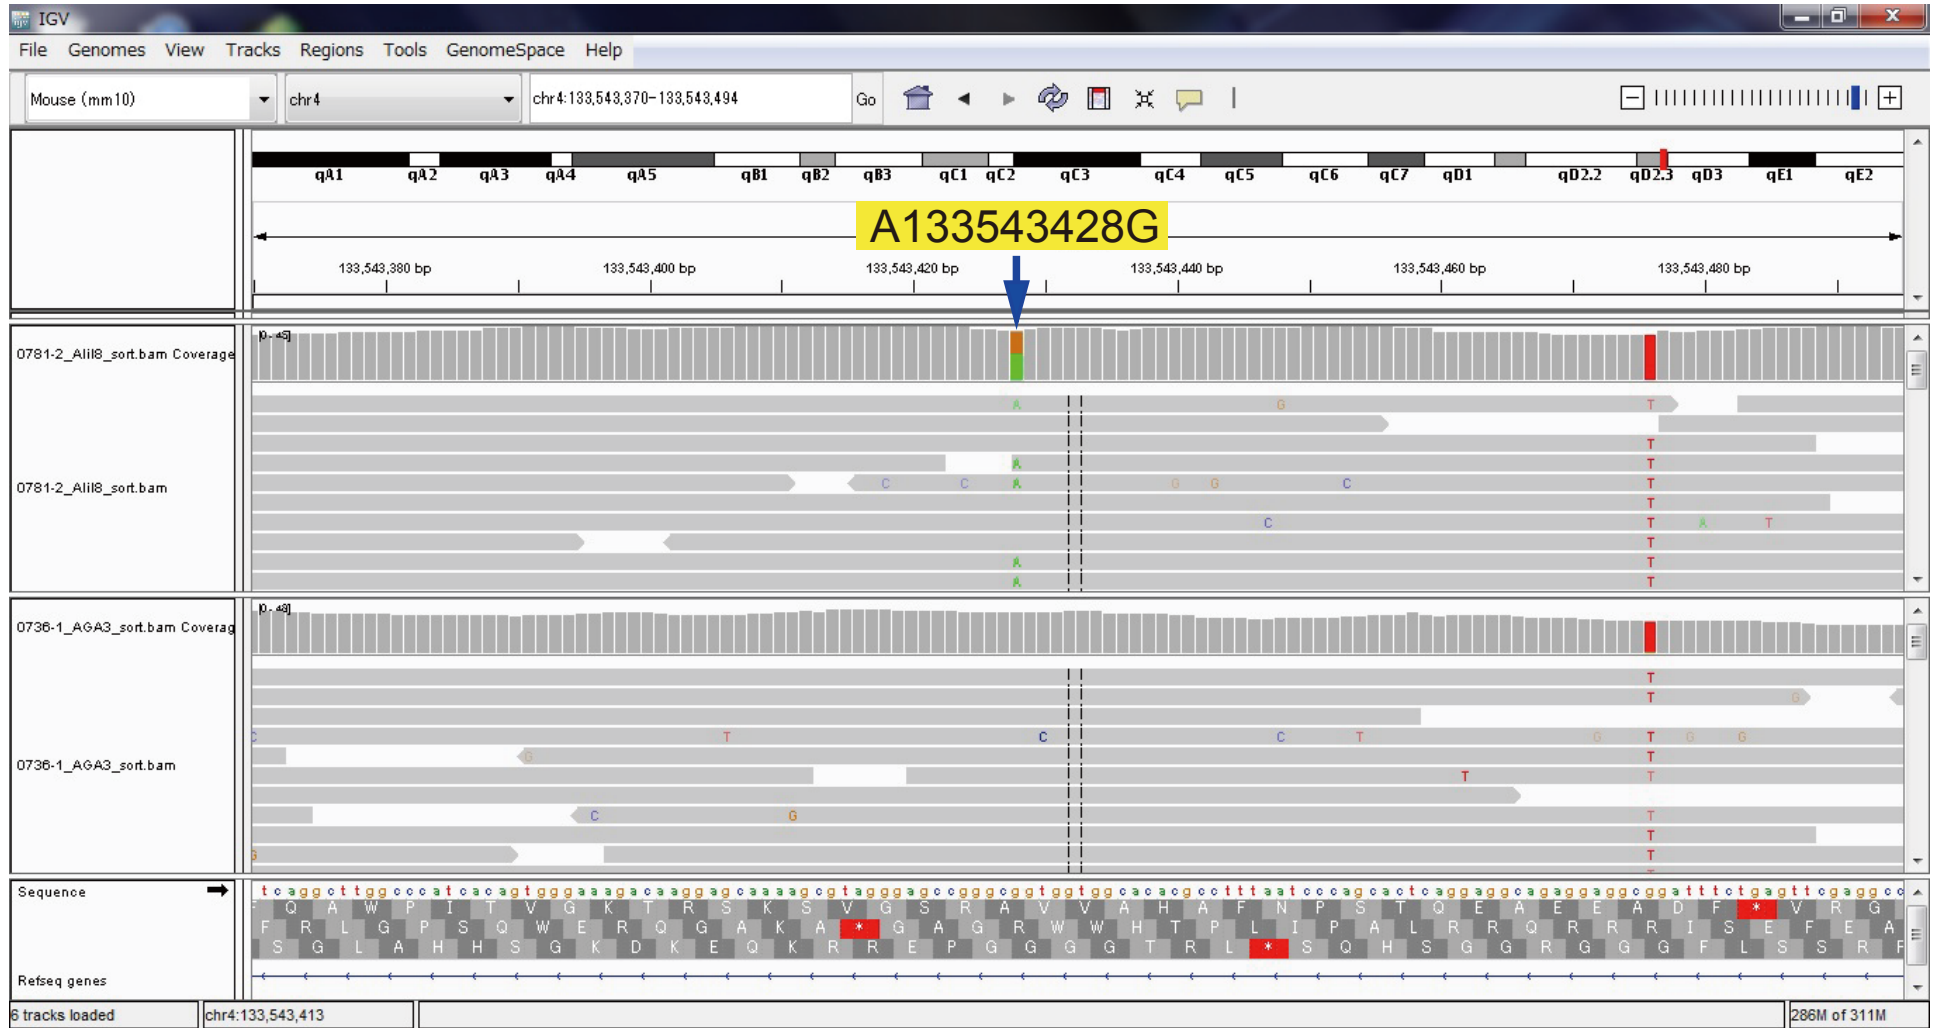

Figure S1

C

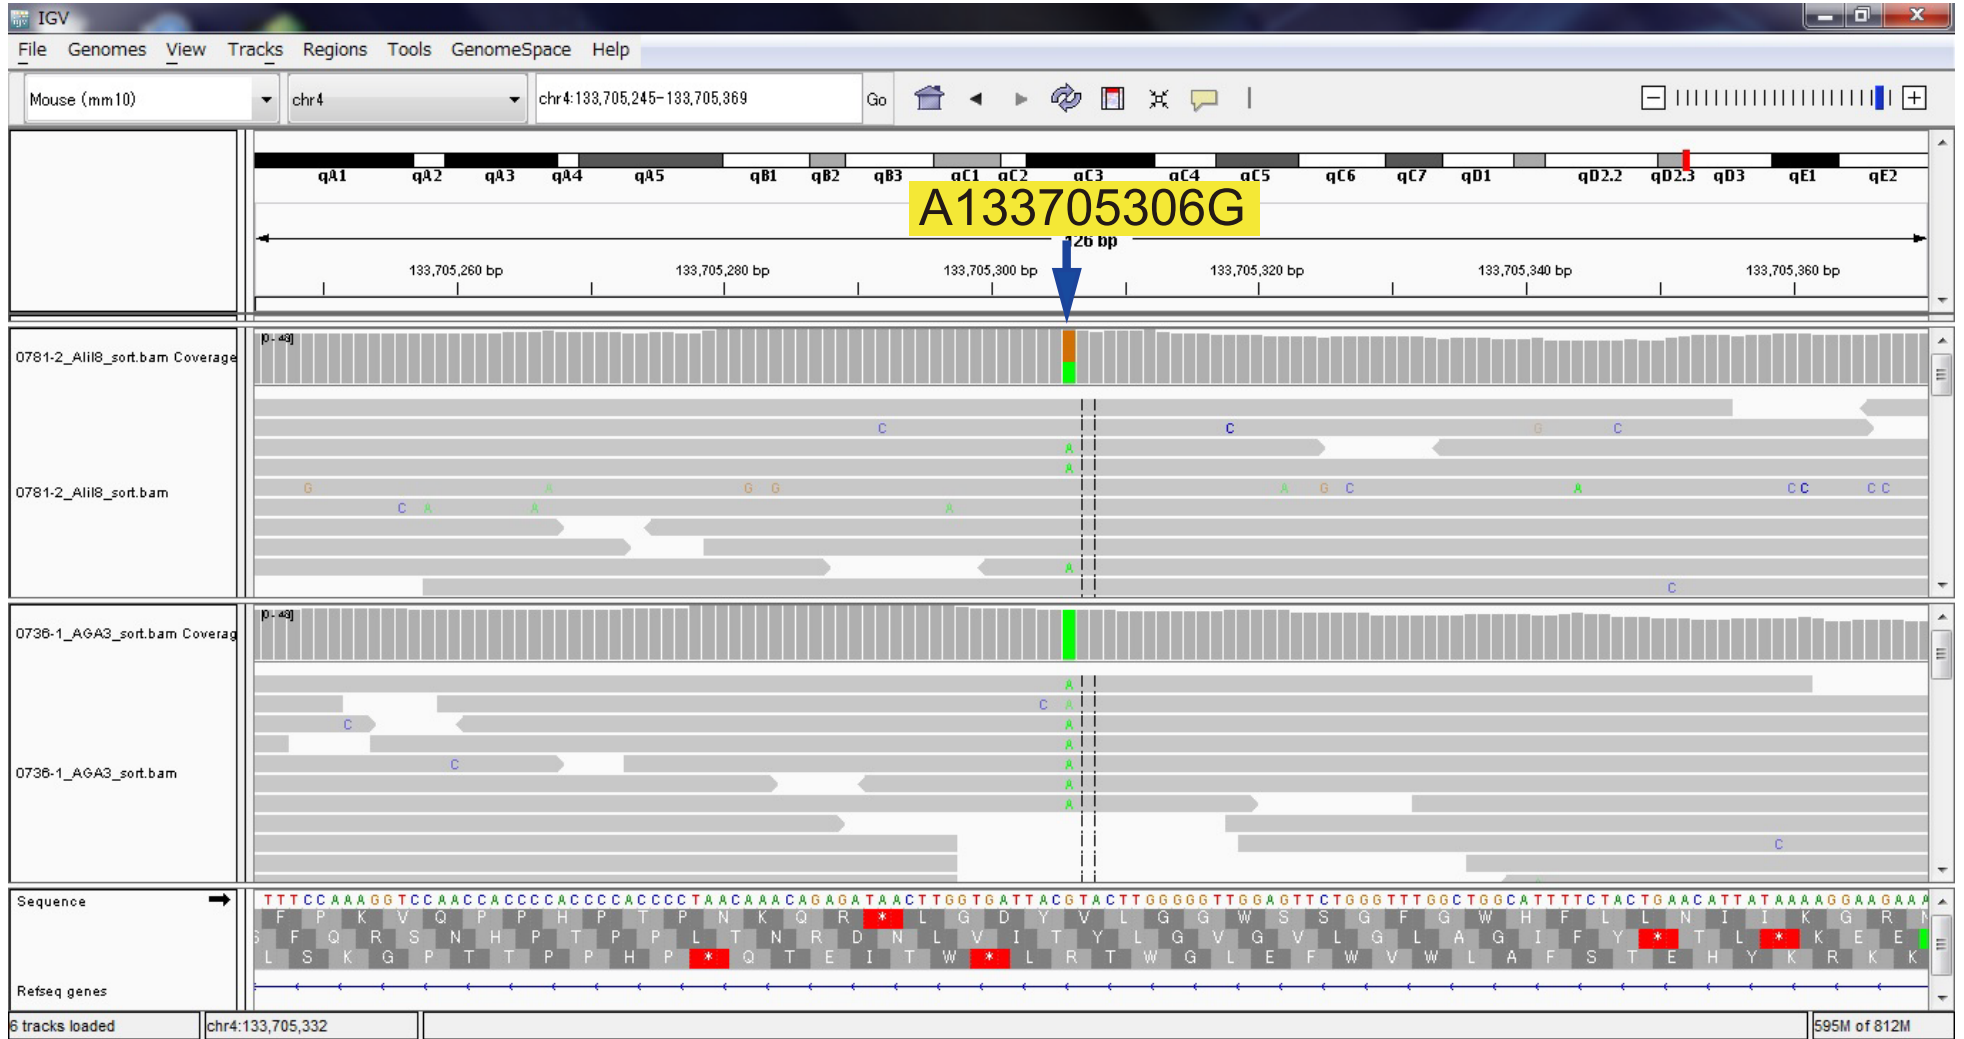

Figure S1

D

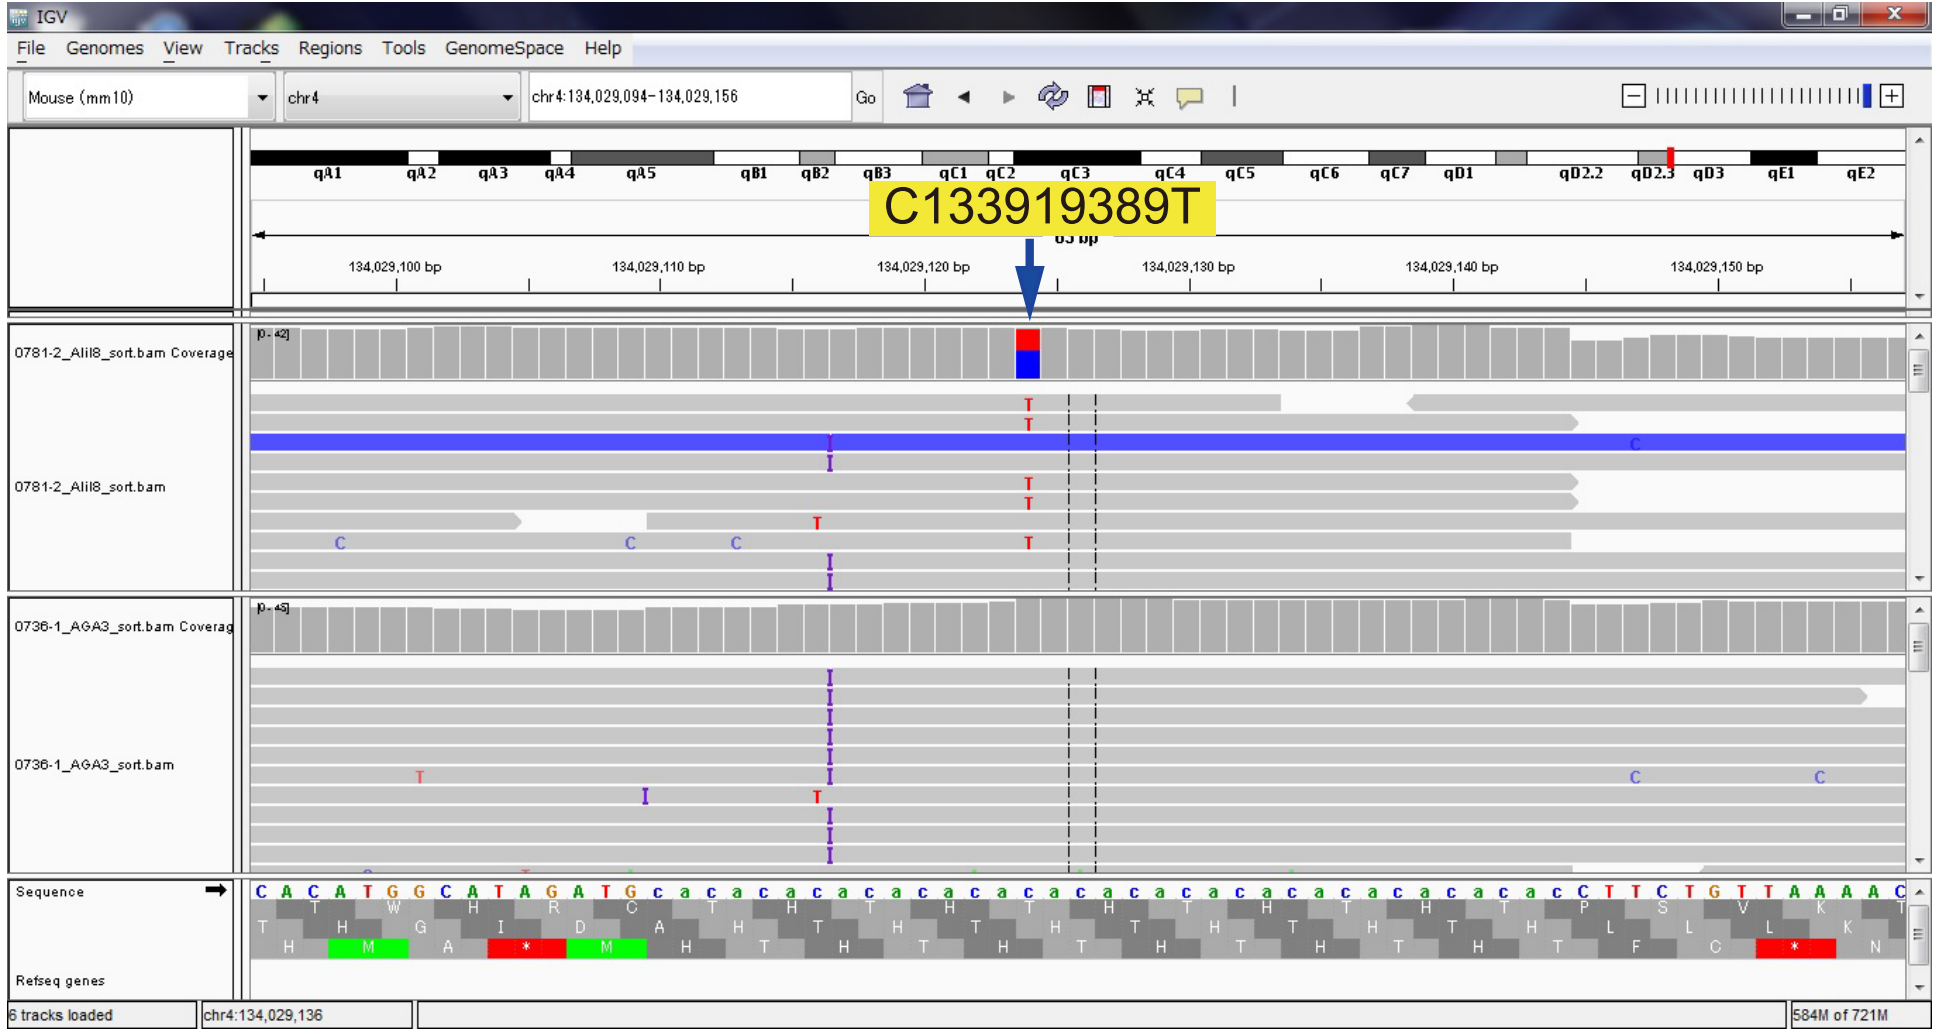

Figure S2

## fgRNA1

14 15 16 17 18 19 20 21 22 23 24 25 26 27 28 29 30 31 32  
 K E D V G L E G D F R S Q T A E E R Y  
 AAGGAGGTAGTGGGCCTGGAAGGGGACTTCCCGAGCCAAACGGCTGAAGAACGCTAT  
 PAM ←fgRNA1

**A #404a: 1 bp deletion, frame shift** Arthritis (-)  
 14 15 16 17 18 19 20 21 22 23 24 25 26 27 28 29 30 31  
 K E D V G L E G D F R S **K R L K N A**  
 AAGGAGGTAGTGGGCCTGGAAGGGGACTTCCCGAGC - AAACGGCTGAAGAACGCTAT

**B #404b: 1 bp insertion, frame shift, stop** Arthritis (-)  
 14 15 16 17 18 19 20 21 22 23 24 25 26 27 28  
 K E D V G L E G D F R S **P N G Stop**  
 AAGGAGGTAGTGGGCCTGGAAGGGGACTTCCCGAGCCAAACGGCTGAAGAACGCTAT

**C #408a: Point mutation, missense, S25R** Arthritis (+++)  
 14 15 16 17 18 19 20 21 22 23 24 25 26 27 28 29 30 31 32  
 K E D V G L E G D F R **R** Q T A E E R Y  
 AAGGAGGTAGTGGGCCTGGAAGGGGACTTCCCGAGCGCAAACGGCTGAAGAACGCTAT

**D #415a: 20 bp deletion, frame shift, stop** Arthritis (-)  
 14 15 16 17 18 19 20 21  
 K E D V G L E G **Stop**  
 AAGGAGGTAGTGGGCCTGGAAG -----(20 bp del.)----- GCTGAAGAACGCTAT

**E #415b: 27 bp deletion, in frame** Arthritis (+)  
 14 15 16 17 18 19 20 21 22 23  
 K E D V G L E **E** R Y  
 AAGGAGGTAGTGGGCCTGGAAG -----(27 bp del.)----- AACGCTAT

**F #416a: 1 bp deletion, frame shift** Arthritis (-)  
 14 15 16 17 18 19 20 21 22 23 24 25 26 27 28 29 30 31  
 K E D V G L E G D F R S **K R L K N A**  
 AAGGAGGTAGTGGGCCTGGAAGGGGACTTCCCGAGC - AAACGGCTGAAGAACGCTAT

**G #41b: 6 bp deletion, in frame** Arthritis (+)  
 14 15 16 17 18 19 20 21 22 23 24 25 26 27 28 29 30  
 K E D V G L E G D F Q T A E E R Y  
 AAGGAGGTAGTGGGCCTGGAAGGGGACTTCC-(6 bp del.)-AAACGGCTGAAGAACGCTAT

## fgRNA2

Translational initiation (ATG)  
 SA (splice acceptor) 1 2 3 4 5 6 7 8 9 10 11 12 13  
 M G C V F C K K L E P A S  
 ccccttctgcatcagGGCATCTGGAATGGGCTGTGTGTTCTGCAAGAAGTTGGAGCCTGCATCC  
 fgRNA2→ PAM

**H #417a: 16 bp deletion, no splice acceptor** Arthritis (-)  
 No SA No ATG  
 ccccttctgca----- (16 bp del.) -----GGGCTGTGTGTTCTGCAAGAAGTTGGAGCCTGCATCC

**I #417b: 7 bp deletion, in frame** Arthritis (+) and (-)  
 1 2 3 4 5 6 7 8 9 10 11 12 13  
 M G C V F C K K L E P A S  
 ccccttctgcatcagGGCAT-(7 bp del.)GGGCTGTGTGTTCTGCAAGAAGTTGGAGCCTGCATCC

**J #418: 5 bp deletion, no translational initiation site** Arthritis (-)  
 No ATG  
 ccccttctgcatcagGGCATCT-( )GGGCTGTGTGTTCTGCAAGAAGTTGGAGCCTGCATCC  
 5 bp del.

**K #419: 13 bp deletion, no translational initiation site** Arthritis (-)  
 No ATG  
 ccccttctgcatca----- (13 bp del.) -----GGGCTGTGTGTTCTGCAAGAAGTTGGAGCCTGCATCC

**Fig. S2** CRISPR/Cas9-mediated genome editing of the Fgr locus. Sequence analysis of F1 animals derived from a construct containing fgRNA1 guide RNA spanning +72 to +91 (a) and fgRNA2 guide RNA spanning -18 to +2 (b). Gnotypes of germline transmitted F1 animals around guide RNAs and autoinflammatory phenotype (Arthritis) shown in Figure 2 are described. Predicted Fgr protein products or transcribe are also indicated.



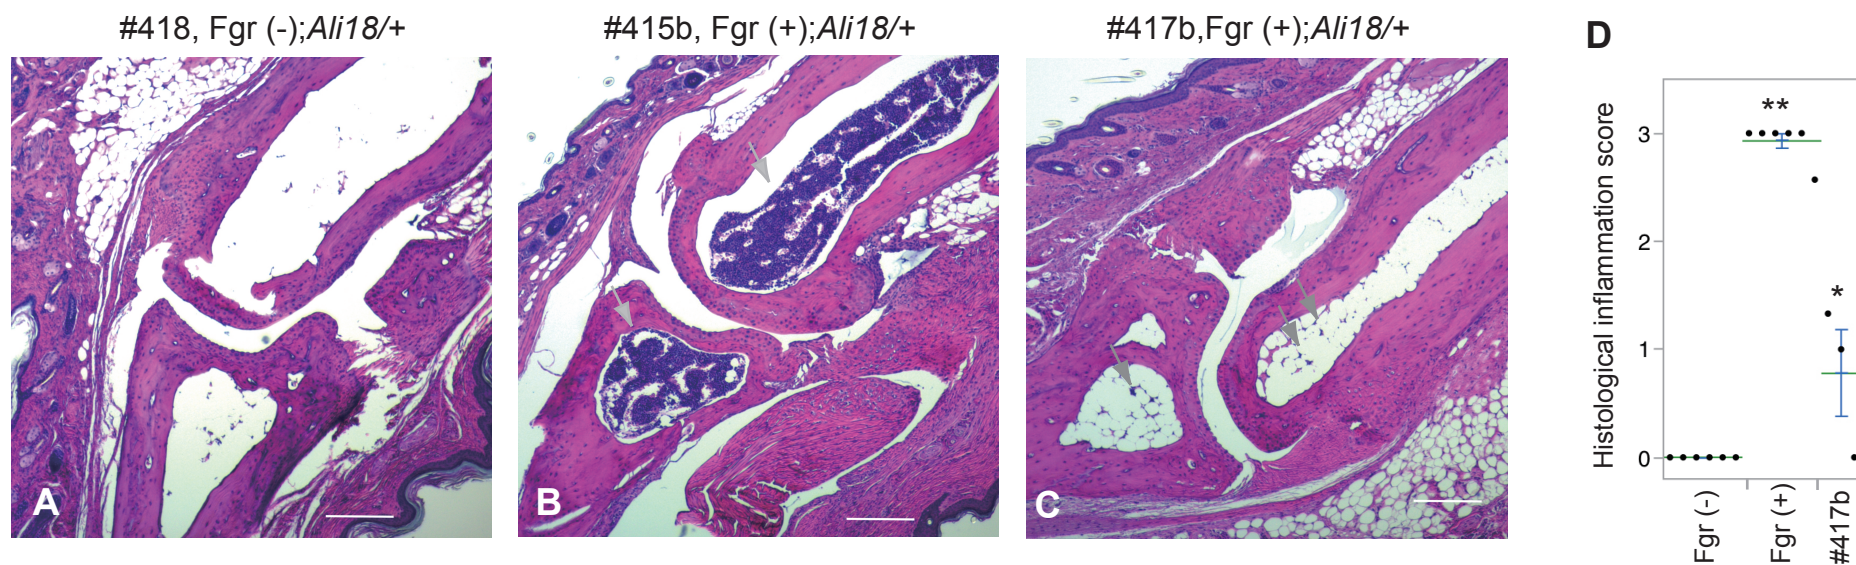

**Fig. S3** Histological analysis of peripheral paws of F1 mice with genetic modification by CRISPR/Cas9-mediated genome editing of the *Fgr* locus. (A) Hematoxylin and eosin (HE) stained sections of the joint between talus and navicular bone from #418 strain F1 mice are indicated. The #418 strain has a deleterious mutation of *Fgr*. Other strains with the same mutation type are grouped as Fgr (-). (B) HE stained sections of the joint between talus and navicular bone from #415 F1 mice are indicated. The #415 has a missense (in flame) mutation of *Fgr*. Other strains with in flame mutation type are grouped as Fgr (+). Inflammation cells in bone marrow are indicated by arrows. (C) HE stained sections of the joint between talus and navicular bone from #417 F1 mice. #417 has deletion in exon 3 but resulted in intact *Fgr*. #417 F1 mice show a partial inflammatory paw phenotype. (D) Histological scoring for severity of bone inflammation was performed on peripheral paws of F1 mice. Fgr (+) (n = 6), Fgr(-) (n = 6), and #417b (n = 3) were used. Average bar (x axis) and SE bar (y axis) are shown. \*:  $P < 0.005$ ; \*\*:  $P < 0.0001$  by paired *t*-tests.

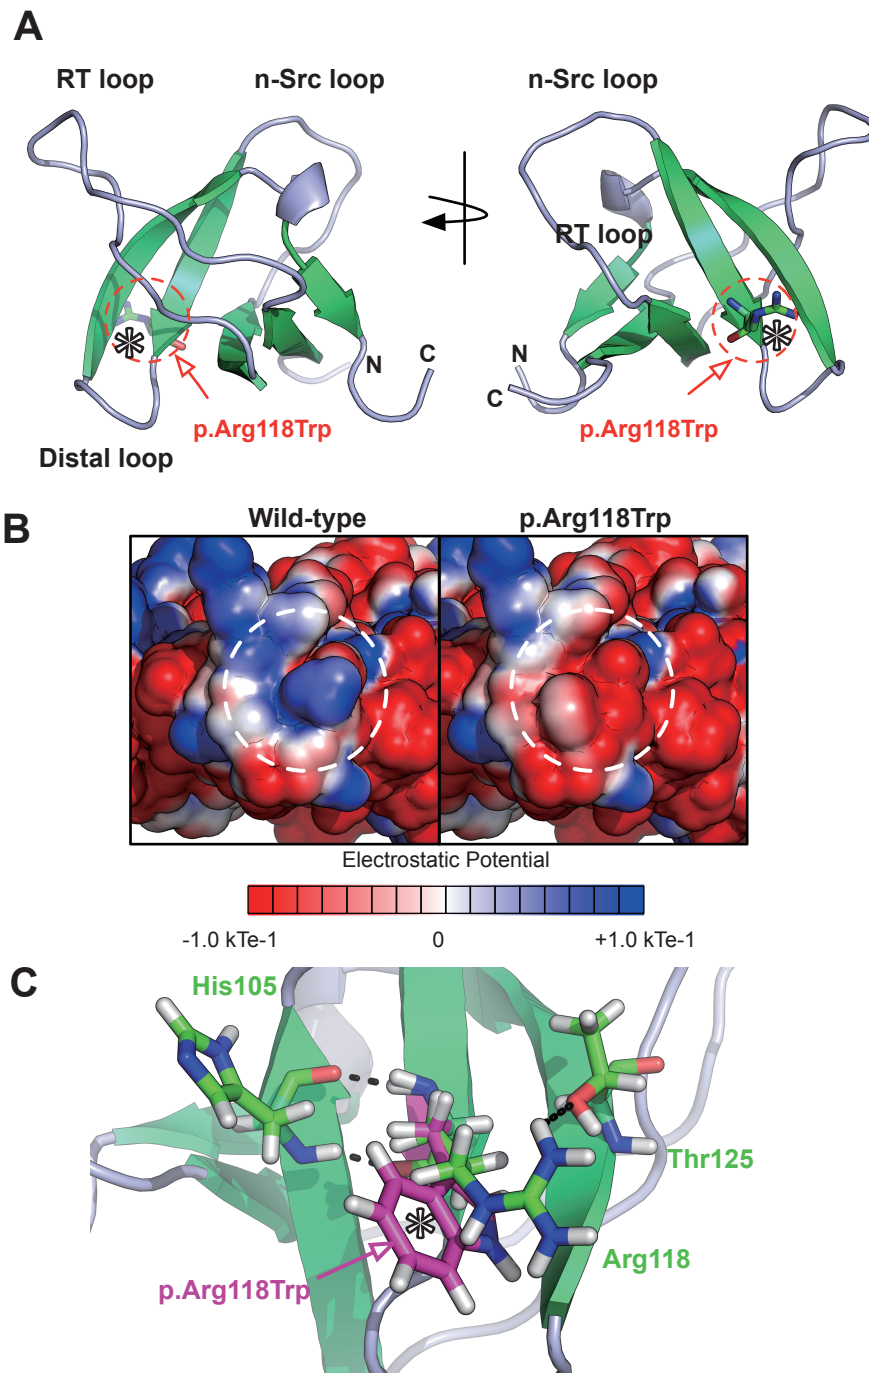

**Fig. S4. Predicted mechanism of the human FGR p.Arg118Trp mutation.**

(A) Structural model of the FGR SH3 domain generated using C-SRC as a template (PDB: 1FMK). The p.Arg118Trp mutation is located in a beta strand near the distal loop of the SH3 domain. (B) Wild-type and p.Arg118Trp electrostatic potentials were analyzed using APBS. The p.Arg118Trp mutation leads to a loss of positive charge. (C) Superimposition of the final structures obtained during a 100-ns simulation. The p.Arg118Trp disrupts a hydrogen bonding interaction with the neighboring Thr125 residue. Asterisk indicates amino acid substitution.

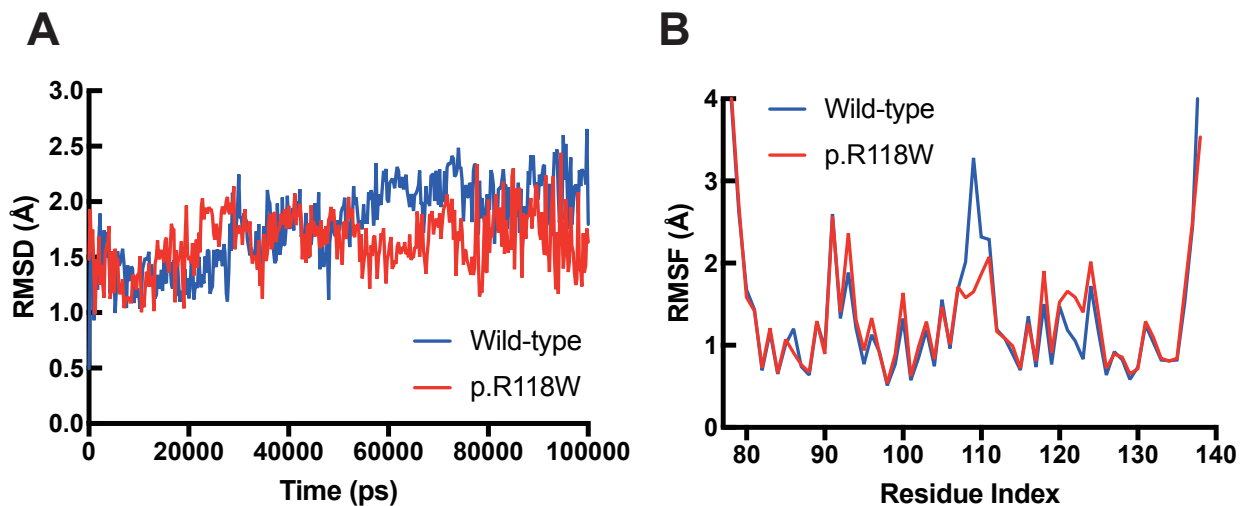

**Fig. S5 Molecular dynamics simulations of the wild-type and p.Arg118Trp FGR SH3 domain.** (A) Both wild-type and p.Arg118Trp SH3 domain models were analyzed using all-atom molecular dynamics (MD) simulations (100-ns each). Root mean square deviation (RMSD) values of the FGR SH3 domain backbone atoms were calculated relative to the initial minimized structure throughout the simulation. Both the wild-type and p.Arg118Trp FGR reached equilibrium at around 30-ns of simulation. (B) Further analysis of root mean square fluctuation (RMSF) versus the protein residue for the wild-type and p.Arg118Trp FGR SH3 domains is illustrated. Both the wild-type and mutant SH3 domains possess the similar RMSF distributions.





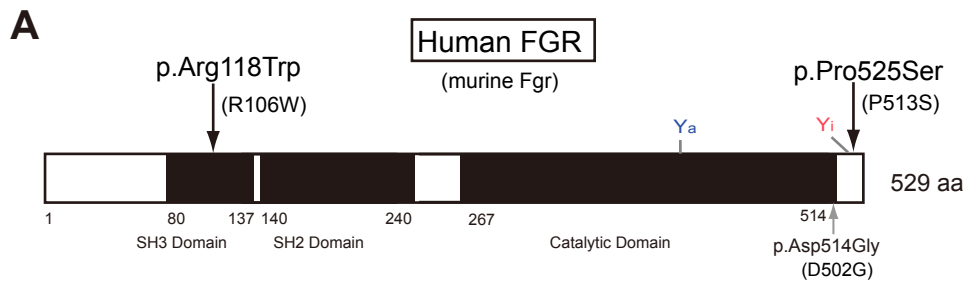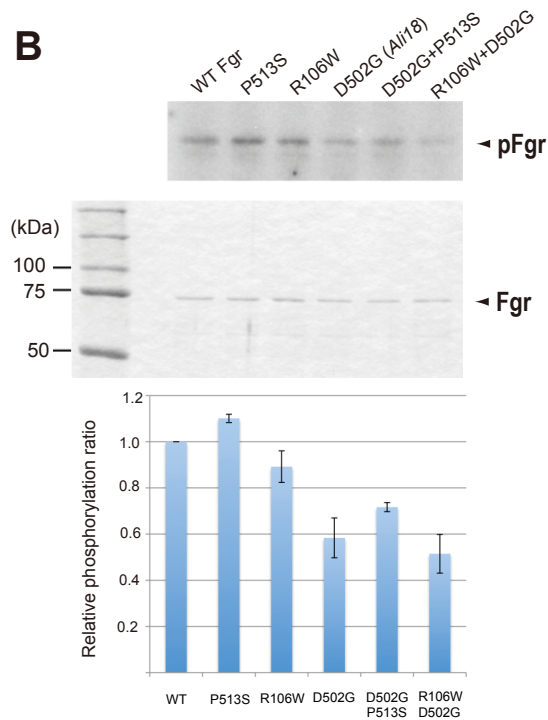

Fig. S7. C-terminal phosphorylation of murin Fgr corresponding to human mutations.(A) Schematic diagram of the amino acid changes caused by human FGR coding mutation found in CRMO. Corresponding murine Fgr mutations were indicated in parentheses. Ya and Yi indicate the autophosphorylation site (412 tyrosine) and the C-terminal regulatory phosphorylation site (523 tyrosine), respectively. (B) Phosphorylation of mutant murine Fgr proteins corresponding human FGR coding mutations by Csk. All Fgr proteins also contain the KD mutation (p.Lys279Met). (top) Phosphorylated Fgr proteins by Csk are shown. The proteins used for kinase assays were fractionated by SDS-PAGE and stained by Coomassie brilliant blue (middle). Experiments are independently triplicated.

Table S1 Genetic mapping of the *Al18* critical region using in house microsatellite markers

| ID       | tag | D4Mit12 | D4Mit203 | D4Neu12 | D4Neu6 | D4Mit204 | D4Mit71 | D4Mit339 | D4Neu9 | D4Mit134 | D4Mit54 | D4Mit68 |
|----------|-----|---------|----------|---------|--------|----------|---------|----------|--------|----------|---------|---------|
| 10128572 | 9   | B/B     | B/B      | C/C     | C/C    | C/C      | C/C     | C/C      | C/C    | C/C      | C/C     | C/C     |
| 10135632 | 69  | B/B     | B/B      | B/B     | C/B    | C/B      | C/B     | C/B      | C/B    | C/B      | C/B     | C/B     |
| 10138700 | 24  | C/B     | C/B      | C/B     | C/B    | C/B      | C/B     | C/B      | C/B    | B/B      | B/B     | B/B     |

B/B: Homozygous for C57BL/6J; C/C: Homozygous for C3HeB/FeJ; C/B: Heterozygous of C3HeB/FeJ and C57BL/6J

Table S2 Summary of Fgr coding variants induced by the CRISPR/Cas9 system in *Ali18* mice

| Strain | guide<br>RNA | Nucleotide<br>change | Protein change     | Mutation type             | Fgr                     |                  | Generation<br>(genotype) | Inheritance | Swollen<br>paws |
|--------|--------------|----------------------|--------------------|---------------------------|-------------------------|------------------|--------------------------|-------------|-----------------|
|        |              |                      |                    |                           | products<br>(predicted) | Fgr<br>haplotype |                          |             |                 |
| #404a  | fgRNA1       | c.76delC             | p.Gln26fs*35       | frame shift, nonsense     | -                       | p.Asp502Gly      | F1 ( <i>Ali18</i> /+)    | 5           | 0               |
| #404b  | fgRNA1       | c.75_76insC          | p.Gln26fs*4        | frame shift, nonsense     | -                       | p.Asp502Gly      | F1 ( <i>Ali18</i> /+)    | 8           | 0               |
| #408a  | fgRNA1       | c.75C>G              | p.S25R             | missense                  | +                       | p.Asp502Gly      | F1 ( <i>Ali18</i> /+)    | 6           | 6               |
| #408b  | fgRNA1       | c.75_76del           | p.Ser25fs*4        | frame shift, nonsense     | -                       | p.Asp502Gly      | F1 ( <i>Ali18</i> /+)    | 2           | 0               |
| #415a  | fgRNA1       | c.62_81del           | p.22fs*2           | frame shift, nonsense     | -                       | p.Asp502Gly      | F1 ( <i>Ali18</i> /+)    | 10          | 0               |
| #415b  | fgRNA1       | c.62_88del           | p.Gly21_Glu30del   | deletion                  | +                       | p.Asp502Gly      | F1 ( <i>Ali18</i> /+)    | 4           | 4               |
| #416a  | fgRNA1       | c.76delC             | p.Gln26fs*35       | frame shift, nonsense     | -                       | p.Asp502Gly      | F1 ( <i>Ali18</i> /+)    | 4           | 0               |
| #416b  | fgRNA1       | c.71_76del           | p.Arg24Gln25_26del | missense, deletion        | +                       | p.Asp502Gly      | F1 ( <i>Ali18</i> /+)    | 1           | 1               |
| #417a  | fgRNA2       | c.(-14)_(-3)del      | none               | SA and 5'UTR deletion     | -                       | p.Asp502Gly      | F1 ( <i>Ali18</i> /+)    | 6           | 0               |
| #417b  | fgRNA2       | c.(-5)_2del          | none               | 5'UTR deletion, synonymus | +                       | p.Asp502Gly      | F1 ( <i>Ali18</i> /+)    | 9           | 4               |
| #418   | fgRNA2       | c.(-3)_2del          | p.Met1del          | ATG deletion              | -                       | p.Asp502Gly      | F1 ( <i>Ali18</i> /+)    | 8           | 0               |
| #419   | fgRNA2       | c.(-11)_2del         | p.Met1del          | SA and ATG deletion       | -                       | p.Asp502Gly      | F1 ( <i>Ali18</i> /+)    | 5           | 0               |

**Table S3: All exonic FGR variants found in the 99 CRMO probands**

| CHR | POS [hg19] | dbSNP ID    | Proband | Inheritance       | MAF (gnomAD) | REF | ALT | Effect [NM_005248]       | Other variants* |
|-----|------------|-------------|---------|-------------------|--------------|-----|-----|--------------------------|-----------------|
| 1   | 27939005   | rs191541855 | A       | paternal          | 0.00006457   | A   | G   | 3' UTR                   | n.d.            |
| 1   | 27939442   | rs143850913 | Case 2  | unknown           | 0.000354     | G   | A   | P525S                    | n.d.            |
| 1   | 27941096   | rs757288230 | B       | paternal          | 0.000008164  | TG  | T   | splice acceptor region § | n.d.            |
| 1   | 27941102   | n/a         | B       | paternal          | 0            | A   | T   | splice site region       | n.d.            |
| 1   | 27942276   | rs142998887 | C, D, E | paternal/maternal | 0.01402      | G   | A   | D254=                    | n.d.            |
| 1   | 27942362   | rs367996753 | F, K    | paternal          | 0.001112     | G   | T   | splice site region       | FBLIM1          |
| 1   | 27948132   | rs2231870   | G       | maternal          | 0.003698     | G   | A   | S122=                    | FBLIM1          |
| 1   | 27948146   | rs774209795 | Case1   | de novo           | 0.00001218   | G   | A   | R118W                    | n.d.            |
| 1   | 27952665   | rs536321858 | H       | unknown           | 0            | C   | T   | 5' UTR                   | n.d.            |
| 1   | 27961658   | n/a         | I       | paternal          | 0.0001617    | G   | A   | 5' UTR                   | n.d.            |
| 1   | 27961692   | rs372572478 | J       | paternal          | 0.00006463   | G   | A   | 5' UTR                   | LPIN2           |

\*: Coding variants in CRMO candidate genes which have been characterized. See Table S4 for further information. §: Deletion of 1st G in polypyrimidine tract.



**Table S4: Missense variants in CRMO candidate genes found in probands with FGR coding variants.**

| <b>Gene</b> | <b>CHR</b> | <b>POS [hg19]</b> | <b>dbSNP ID</b> | <b>Protein change</b> | <b>MAF (gnomAD)</b> | <b>Proband</b> | <b>Inheritance</b> |
|-------------|------------|-------------------|-----------------|-----------------------|---------------------|----------------|--------------------|
| LPIN2       | 18         | 2920361           | rs201160155     | C874F                 | 0.0012              | J              | maternal           |
| FBLIM1      | 1          | 16101332          | rs114077715     | G311R                 | 0.01954             | K              | maternal           |
| FBLIM1      | 1          | 16101332          | rs114077715     | G311R                 | 0.01954             | G              | paternal           |

**Supplementary Table S5: Scoring of FGR proteins by *in silico* predictors**

| <b>FGR variant</b> | <b>PROVEAN</b> | <b>CADD</b> | <b>SIFT</b> | <b>POLYPHEN2</b> |
|--------------------|----------------|-------------|-------------|------------------|
| R118W              | -5.015         | 26.3        | D           | D                |
| P525S              | -2.716         | 18.2        | D           | P                |

## References for SI reference citations

1. Toral MA, *et al.* (2017) Structural modeling of a novel SLC38A8 mutation that causes foveal hypoplasia. *Mol Genet Genomic Med* 5(3):202-209.
2. Cox AJ, *et al.* (2017) Recessive coding and regulatory mutations in FBLIM1 underlie the pathogenesis of chronic recurrent multifocal osteomyelitis (CRMO). *PLoS One* 12(3):e0169687.
3. Moshfegh Y, *et al.* (2016) BESTROPHIN1 mutations cause defective chloride conductance in patient stem cell-derived RPE. *Hum Mol Genet* 25(13):2672-2680.
4. Cowan-Jacob SW, *et al.* (2005) The crystal structure of a c-Src complex in an active conformation suggests possible steps in c-Src activation. *Structure* 13(6):861-871.
5. Kaneko T, Li L, & Li SS (2008) The SH3 domain--a family of versatile peptide- and protein-recognition module. *Front Biosci* 13:4938-4952.
6. Waksman G, Shoelson SE, Pant N, Cowburn D, & Kuriyan J (1993) Binding of a high affinity phosphotyrosyl peptide to the Src SH2 domain: crystal structures of the complexed and peptide-free forms. *Cell* 72(5):779-790.
7. Dietrich W, *et al.* (1992) A genetic map of the mouse suitable for typing intraspecific crosses. *Genetics* 131(2):423-447.
8. Dietrich WF, *et al.* (1994) A genetic map of the mouse with 4,006 simple sequence length polymorphisms. *Nat Genet* 7(2 Spec No):220-245.
9. Abe K, Fuchs H, Lisse T, Hans W, & Hrabe de Angelis M (2006) New ENU-induced semidominant mutation, Ali18, causes inflammatory arthritis, dermatitis, and osteoporosis in the mouse. *Mamm Genome* 17(9):915-926.
10. Bagheri-Yarmand R, *et al.* (2001) Etk/Bmx tyrosine kinase activates Pak1 and regulates tumorigenicity of breast cancer cells. *J Biol Chem* 276(31):29403-29409.
11. Cong L, *et al.* (2013) Multiplex genome engineering using CRISPR/Cas systems. *Science* 339(6121):819-823.
12. Xu W, Harrison SC, & Eck MJ (1997) Three-dimensional structure of the tyrosine kinase c-Src. *Nature* 385(6617):595-602.

13. Webb B & Sali A (2016) Comparative Protein Structure Modeling Using MODELLER. *Curr Protoc Protein Sci* 86:2 9 1-2 9 37.
14. Dolinsky TJ, Nielsen JE, McCammon JA, & Baker NA (2004) PDB2PQR: an automated pipeline for the setup of Poisson-Boltzmann electrostatics calculations. *Nucleic Acids Res* 32(Web Server issue):W665-667.
15. Konecny R, Baker NA, & McCammon JA (2012) iAPBS: a programming interface to Adaptive Poisson-Boltzmann Solver (APBS). *Comput Sci Discov* 5(1).
16. Krieger E & Vriend G (2014) YASARA View - molecular graphics for all devices - from smartphones to workstations. *Bioinformatics* 30(20):2981-2982.
17. O'Hare T, *et al.* (2004) Inhibition of wild-type and mutant Bcr-Abl by AP23464, a potent ATP-based oncogenic protein kinase inhibitor: implications for CML. *Blood* 104(8):2532-2539.
